# Supplementary material
Source: HighWire-hosted journal article supplement (http://www.cmaj.ca/highwire/filestream/59860/field_highwire_adjunct_files/0/151510-view-1-at.pdf)
Supplement: 151510-view-1-at.pdf [file 151510-view-1-at.pdf]

**Appendix 1 (as supplied by the authors): pharmacotherapies for smoking cessation**

| Medication      | Dosing and Titration                                                                                                                                                                                                                                                                                                                                                                                                                                                                                                                                                                                                                                                                                                                                                                                                                                                                                                                                                                                                                                                                                                                                                                                                                                                                                                                                                                                                                                                                                                                                                                                                                                                                                   | Advice to patients based on treatment goal                                                                                                                                                                                                                                                                                                                                                                                                                                                                                                                                                                                                                                                                                                                                                                                                                                                                                                                                                                                                                                                                                                                                                            |
|-----------------|--------------------------------------------------------------------------------------------------------------------------------------------------------------------------------------------------------------------------------------------------------------------------------------------------------------------------------------------------------------------------------------------------------------------------------------------------------------------------------------------------------------------------------------------------------------------------------------------------------------------------------------------------------------------------------------------------------------------------------------------------------------------------------------------------------------------------------------------------------------------------------------------------------------------------------------------------------------------------------------------------------------------------------------------------------------------------------------------------------------------------------------------------------------------------------------------------------------------------------------------------------------------------------------------------------------------------------------------------------------------------------------------------------------------------------------------------------------------------------------------------------------------------------------------------------------------------------------------------------------------------------------------------------------------------------------------------------|-------------------------------------------------------------------------------------------------------------------------------------------------------------------------------------------------------------------------------------------------------------------------------------------------------------------------------------------------------------------------------------------------------------------------------------------------------------------------------------------------------------------------------------------------------------------------------------------------------------------------------------------------------------------------------------------------------------------------------------------------------------------------------------------------------------------------------------------------------------------------------------------------------------------------------------------------------------------------------------------------------------------------------------------------------------------------------------------------------------------------------------------------------------------------------------------------------|
| NRT monotherapy | <p><u>Nicotine Patch</u></p> <p><i>Starting dose</i></p> <p>21 mg patch/day, if patient smokes &gt; 19 cigarettes per day<sup>1</sup></p> <p>14 mg patch/day, if patient smokes 10-19 cigarettes per day</p> <p>7 mg patch/day, if patient smokes &lt; 10 cigarettes per day<sup>2</sup></p> <p><i>Titration</i></p> <p>Use starting dose for 6 weeks and reduce dose by 7 mg every 2 weeks thereafter</p> <p>If strong cravings return when attempting downward titration, consider remaining at the higher dose for longer</p> <p>Patch can be used for 10-12 weeks or longer if necessary</p> <p><u>Nicotine Gum or Lozenge</u></p> <p><i>Starting dose</i></p> <p>Use 2 mg if time to first cigarette &gt; 30 minutes after waking</p> <p>Use 4 mg if time to first cigarette ≤ 30 minutes after waking</p> <p><i>Titration</i></p> <p>Use one piece every 1-2 hours for weeks 1-6</p> <p>Use one piece every 2-4 hours for weeks 7-9</p> <p>Use one piece every 4-8 hours for weeks 10-12</p> <p>Use 1-2 pieces/day beyond 12 weeks, if needed to manage cravings</p> <p><u>Nicotine ‘Inhaler’</u></p> <p><i>Starting dose</i></p> <p>6-12 cartridges/ day or as per patient need for first 6 weeks</p> <p><i>Titration</i></p> <p>Gradually reduce number of cartridges/ day from weeks 6-12</p> <p>Use 1-2 cartridges/day beyond 12 weeks, if needed to manage cravings</p> <p><u>Nicotine oral spray</u></p> <p><i>Starting dose</i></p> <p>Use 1-2 sprays every 30-60 minutes for first 6 weeks (maximum 4 sprays/ hour or 64 sprays/ day)</p> <p><i>Titration</i></p> <p>Gradually reduce number of sprays/ day from weeks 6-12</p> <p>Use beyond 12 weeks, if needed to manage cravings</p> | <p><u>Quit abruptly on Target Quit Date</u></p> <p>Set target quit date in next 30 days</p> <p>On target quit date, stop smoking cigarettes and begin using NRT</p> <p>Follow dosing and titration regimen</p> <p>Extend duration of NRT as long as necessary to prevent relapse</p> <p><u>Reduce to quit on Target Quit Date</u></p> <p>Set target quit date in next 30 days</p> <p>Begin using NRT 2-4 weeks before target quit date</p> <p>Set goal to reduce daily cigarette consumption by 50%–75% by target quit date</p> <p>If using faster acting NRTs (gum, lozenge, inhaler, oral spray), should be used to replace omitted cigarettes and when experiencing cravings</p> <p>On target quit date, stop smoking cigarettes and follow regular dosing and titration regimen</p> <p>Extend duration of NRT as long as necessary to prevent relapse</p> <p><u>Reduce Smoking</u></p> <p>Begin using medication</p> <p>Set reduction goal (e.g. decrease daily cigarettes by 50%-75% over time)</p> <p>Consider setting quit date if motivation to quit increases during treatment</p> <p>Use for up to 6 months</p> <p>If no change in smoking behaviour, consider other medication options</p> |

<sup>1</sup> Heavily addicted smokers (> 25 cigarettes per day) may benefit from combining patch strengths so that they receive approximately 1 mg of nicotine for every cigarette smoked per day

<sup>2</sup> For patients smoking ≤ 5 cigarettes per day, consider using faster-acting NRTs rather than NRT patch

|                            |                                                                                                                                                                                                                                                                                                                                                                                                                                                                                                                                                                                                                                                                                                                                                                                                                                                                                                                                                                                                                                                                                                                                          |                                                                                                                                                                                                                                                                                                                                                                                                                                                                                                                                                                                                                                                                                                                                                                                                                                                                                                                                                                                                                                                                                                                                                                  |
|----------------------------|------------------------------------------------------------------------------------------------------------------------------------------------------------------------------------------------------------------------------------------------------------------------------------------------------------------------------------------------------------------------------------------------------------------------------------------------------------------------------------------------------------------------------------------------------------------------------------------------------------------------------------------------------------------------------------------------------------------------------------------------------------------------------------------------------------------------------------------------------------------------------------------------------------------------------------------------------------------------------------------------------------------------------------------------------------------------------------------------------------------------------------------|------------------------------------------------------------------------------------------------------------------------------------------------------------------------------------------------------------------------------------------------------------------------------------------------------------------------------------------------------------------------------------------------------------------------------------------------------------------------------------------------------------------------------------------------------------------------------------------------------------------------------------------------------------------------------------------------------------------------------------------------------------------------------------------------------------------------------------------------------------------------------------------------------------------------------------------------------------------------------------------------------------------------------------------------------------------------------------------------------------------------------------------------------------------|
| <p>NRT<br/>Combination</p> | <p><u>Nicotine patch</u><br/><i>Starting dose</i><br/>21 mg patch/day, if patient smokes &gt; 19 cigarettes per day<sup>3</sup><br/>14 mg patch/day, if patient smokes 10-19 cigarettes per day<br/>7 mg patch/day, if patient smokes &lt; 10 cigarettes per day</p> <p style="text-align: center;"><i>PLUS</i></p> <p><u>Nicotine gum or lozenge</u><br/>2 or 4 mg based on time to first cigarette<br/>Use 1 piece every 1-2 hours as needed (at least 4-5 pieces per day)</p> <p style="text-align: center;"><i>OR</i></p> <p><u>Nicotine inhaler</u><br/>Use 1 cartridge every 1-2 hours or as needed</p> <p style="text-align: center;"><i>OR</i></p> <p><u>Nicotine oral mist</u><br/>Use 1 spray every 1-2 hours as needed</p> <p><i>Titration</i><br/>Use starting NRT patch dose for 6 weeks and reduce dose by 7 mg every 2 weeks thereafter<br/>If strong cravings return when attempting downward titration, consider remaining at the higher dose for longer<br/>NRT can be used for 10-12 weeks or longer if necessary<br/>Gum, lozenge, inhaler or oral spray can be used after discontinuation of patch, as required</p> | <p><u>Quit abruptly on Target Quit Date</u><br/>Set target quit date in next 30 days<br/>On target quit date, stop smoking cigarettes and begin using combination NRT<br/>Follow dosing and titration regimen<br/>Extend duration of NRT as long as necessary to prevent relapse</p> <p><u>Reduce to quit on Target Quit Date</u><br/>Set target quit date in next 30 days<br/>Begin using combination NRT 2-4 weeks before target quit date<br/>Set goal to reduce daily cigarette consumption by 50%–75% by target quit date<br/>Use faster acting NRTs (gum, lozenge, inhaler, oral spray) to replace omitted cigarettes and when experiencing cravings<br/>On target quit date, stop smoking cigarettes and follow regular dosing and titration regimen<br/>Extend duration of NRT as long as necessary to prevent relapse</p> <p><u>Reduce Smoking</u><br/>Begin using combination NRT<br/>Set reduction goal (e.g. decrease daily cigarettes by 50%-75% over time)<br/>Consider setting quit date if motivation to quit increases during treatment<br/>Use for up to 6 months<br/>If no change in smoking behaviour, consider other medication options</p> |
|----------------------------|------------------------------------------------------------------------------------------------------------------------------------------------------------------------------------------------------------------------------------------------------------------------------------------------------------------------------------------------------------------------------------------------------------------------------------------------------------------------------------------------------------------------------------------------------------------------------------------------------------------------------------------------------------------------------------------------------------------------------------------------------------------------------------------------------------------------------------------------------------------------------------------------------------------------------------------------------------------------------------------------------------------------------------------------------------------------------------------------------------------------------------------|------------------------------------------------------------------------------------------------------------------------------------------------------------------------------------------------------------------------------------------------------------------------------------------------------------------------------------------------------------------------------------------------------------------------------------------------------------------------------------------------------------------------------------------------------------------------------------------------------------------------------------------------------------------------------------------------------------------------------------------------------------------------------------------------------------------------------------------------------------------------------------------------------------------------------------------------------------------------------------------------------------------------------------------------------------------------------------------------------------------------------------------------------------------|

<sup>3</sup> Heavily addicted smokers (> 25 cigarettes per day) may benefit from combining patch strengths so that they receive approximately 1 mg of nicotine for every cigarette smoked per day

|             |                                                                                                                                                                                                                                                                                                                                                                                                                                                                                                                                                                                                                              |                                                                                                                                                                                                                                                                                                                                                                                                                                                                                                                                                                                                                                                                                                                                                                                                                                                                                                                                                                                                                                                                                                                                                                                                                                                                                           |
|-------------|------------------------------------------------------------------------------------------------------------------------------------------------------------------------------------------------------------------------------------------------------------------------------------------------------------------------------------------------------------------------------------------------------------------------------------------------------------------------------------------------------------------------------------------------------------------------------------------------------------------------------|-------------------------------------------------------------------------------------------------------------------------------------------------------------------------------------------------------------------------------------------------------------------------------------------------------------------------------------------------------------------------------------------------------------------------------------------------------------------------------------------------------------------------------------------------------------------------------------------------------------------------------------------------------------------------------------------------------------------------------------------------------------------------------------------------------------------------------------------------------------------------------------------------------------------------------------------------------------------------------------------------------------------------------------------------------------------------------------------------------------------------------------------------------------------------------------------------------------------------------------------------------------------------------------------|
| Varenicline | <p><i>Standard dosing</i></p> <ul style="list-style-type: none"> <li>0.5 mg once daily for days 1-3</li> <li>0.5 mg twice daily for days 4-7</li> <li>1 mg twice daily for weeks 2-12<sup>4</sup></li> </ul> <p><i>Titration</i></p> <p>If experiencing side effects, dose can be reduced to 0.5 mg twice daily for weeks 2-12</p> <p>Varenicline can be used for an additional 12 weeks, if needed</p> <p><i>Combination with NRT</i></p> <p>If cravings persist, consider combining varenicline with a daily NRT patch or a faster acting NRT (inhaler, gum, lozenge, oral spray) as per NRT dosing instructions above</p> | <p><u>Quit abruptly on Target Quit Date</u></p> <ul style="list-style-type: none"> <li>Set target quit date</li> <li>Begin using varenicline 8-35 days before target quit date</li> <li>Follow dosing and titration regimen</li> <li>If patient is smoke-free at 12 weeks, consider extending varenicline to 24 weeks to prevent relapse</li> </ul> <p><u>Reduce to quit on Target Quit Date</u></p> <ul style="list-style-type: none"> <li>Set target quit date, up to 3 months in advance</li> <li>Begin using varenicline 2 to 12 weeks before target quit date</li> <li>Set goal to reduce daily cigarette consumption by at least 50% by target quit date</li> <li>On target quit date, stop smoking cigarettes, and follow regular dosing and titration regimen</li> <li>If patient is smoke-free at 12 weeks, consider extending varenicline to 24 weeks to prevent relapse</li> </ul> <p><u>Reduce Smoking</u></p> <ul style="list-style-type: none"> <li>Begin using varenicline</li> <li>Set reduction goal (e.g. decrease daily cigarettes by 50%-75% over time)</li> <li>Consider setting quit date if motivation to quit increases during treatment</li> <li>Use for up to 6 months</li> <li>If no change in smoking behaviour, consider other medication options</li> </ul> |
|-------------|------------------------------------------------------------------------------------------------------------------------------------------------------------------------------------------------------------------------------------------------------------------------------------------------------------------------------------------------------------------------------------------------------------------------------------------------------------------------------------------------------------------------------------------------------------------------------------------------------------------------------|-------------------------------------------------------------------------------------------------------------------------------------------------------------------------------------------------------------------------------------------------------------------------------------------------------------------------------------------------------------------------------------------------------------------------------------------------------------------------------------------------------------------------------------------------------------------------------------------------------------------------------------------------------------------------------------------------------------------------------------------------------------------------------------------------------------------------------------------------------------------------------------------------------------------------------------------------------------------------------------------------------------------------------------------------------------------------------------------------------------------------------------------------------------------------------------------------------------------------------------------------------------------------------------------|

<sup>4</sup> Caution patients about risk of premature discontinuation of varenicline, if they achieve early success

|           |                                                                                                                                                                                                                                                                                                                                                                                                                                                                                                                                                   |                                                                                                                                                                                                                                                                                                                                                                                                                                                                                                                                                                                                                                                                                                                                                                                                                                                                                                             |
|-----------|---------------------------------------------------------------------------------------------------------------------------------------------------------------------------------------------------------------------------------------------------------------------------------------------------------------------------------------------------------------------------------------------------------------------------------------------------------------------------------------------------------------------------------------------------|-------------------------------------------------------------------------------------------------------------------------------------------------------------------------------------------------------------------------------------------------------------------------------------------------------------------------------------------------------------------------------------------------------------------------------------------------------------------------------------------------------------------------------------------------------------------------------------------------------------------------------------------------------------------------------------------------------------------------------------------------------------------------------------------------------------------------------------------------------------------------------------------------------------|
| Bupropion | <p><i>Standard dosing</i></p> <p>150 mg once daily for days 1-3<br/>150 mg twice daily (at least 8 hours apart), day 4 to week 12</p> <p><i>Titration</i></p> <p>If experiencing side effects, dose can be reduced to 150 mg once daily for day 4- week 12<br/>Bupropion can be used for an additional 12 weeks, if needed</p> <p><i>Combination with NRT</i></p> <p>If cravings persist, consider combining bupropion with a daily NRT patch or a faster acting NRT (inhaler, gum, lozenge, oral spray) as per NRT dosing instructions above</p> | <p><u>Quit abruptly on Target Quit Date</u></p> <p>Set target quit date in next 30 days<br/>Begin using bupropion 7 days before target quit date<br/>Follow dosing and titration regimen<br/>If patient is smoke-free at 12 weeks, consider extending bupropion to 24 weeks to prevent relapse</p> <p><u>Reduce to quit on Target Quit Date</u></p> <p>Set target quit date<br/>Begin using bupropion 4 weeks before target quit date<br/>Set goal to reduce daily cigarette consumption by 50%–75% by target quit date<br/>On target quit date, stop smoking cigarettes and follow regular dosing and titration regimen<br/>If patient is smoke-free at 12 weeks, consider extending bupropion to 24 weeks to prevent relapse</p> <p><u>Reduce Smoking</u></p> <p>There are no studies demonstrating the effectiveness of bupropion for achieving abstinence in patients in a reduced smoking scenario</p> |
|-----------|---------------------------------------------------------------------------------------------------------------------------------------------------------------------------------------------------------------------------------------------------------------------------------------------------------------------------------------------------------------------------------------------------------------------------------------------------------------------------------------------------------------------------------------------------|-------------------------------------------------------------------------------------------------------------------------------------------------------------------------------------------------------------------------------------------------------------------------------------------------------------------------------------------------------------------------------------------------------------------------------------------------------------------------------------------------------------------------------------------------------------------------------------------------------------------------------------------------------------------------------------------------------------------------------------------------------------------------------------------------------------------------------------------------------------------------------------------------------------|

Note: NRT = nicotine replacement therapy
